# Supplementary material for: Draft Genome Sequences of Xanthomonas sacchari and Two Banana-Associated Xanthomonads Reveal Insights into the Xanthomonas Group 1 Clade
Source: MDPI journal article supplement (doi:10.3390/genes2041050), 2011-12-02
Supplement: s1 [file s1]

Xsp132/690-821  
Xsp4393/690-821  
CBA16221.Xanthomonas albilineans/690-821  
YP\_003376211.Xanthomonas albilineans/690-821  
ABY87166.Xanthomonas albilineans/690-821  
YP\_201045.Xanthomonas oryzae pv oryzae KACC10331/690-784  
ZP\_02242791.Xanthomonas oryzae pv oryzicola BLS256/690-784  
YP\_363403.Xanthomonas campestris pv vesicatoria str 85\_10/690-784  
NE\_60749476.Xanthomonas fuscans subsp aurantifolii str ICPB\_11122/690-784  
YP\_201045.Xanthomonas axonopodis pv citri str 306/690-784  
ZP\_064847.Xanthomonas campestris pv vasculorum NCPBP702/690-784  
NE\_636945.Xanthomonas campestris pv campestris str ATCC\_33913/690-784  
YP\_299829.Xylella fastidiosa 9a5c/690-784  
ZP\_00651473.Xylella fastidiosa Dixon/690-784  
YP\_780116.Xylella fastidiosa Temecual/690-784  
ZP\_00680404.Xylella fastidiosa Ann 1/690-784  
ZP\_05133559.Stenotrophomonas pv SKA14/690-781  
YP\_001972873.Stenotrophomonas maltophilia K279a/690-781  
YP\_002028961.Stenotrophomonas maltophilia R551\_3/690-781  
ZP\_04962496.Vibrio cholerae AN 19226/690-774  
ZP\_01959501.Vibrio cholerae M20\_3/690-774  
ZP\_04410790.Vibrio cholerae T10\_1079\_80/690-774  
NE\_230903.Vibrio cholerae O1 biovar El Tor str N19661/690-774  
ZP\_04400652.Vibrio cholerae B33/690-774  
ZP\_05419603.Vibrio cholerae CIRS\_101/690-774  
ZP\_01979964.Vibrio cholerae M20\_2/690-774  
ZP\_01948050.Vibrio cholerae T587/690-774  
ZP\_04405090.Vibrio cholerae TMA 21/690-774  
ZP\_05715247.Vibrio mimicus VM573/690-774  
ZP\_05719378.Vibrio mimicus VM603/690-774  
ZP\_06078960.Vibrio sp RC586/690-774  
ZP\_05925312.Vibrio sp RC341/690-760  
ZP\_02197384.Vibrio sp AND4/690-774  
ZP\_05881832.Vibrio metschnikovii CIP\_69\_14/690-760  
ZP\_01237041.Vibrio angustum SK4/690-760  
ZP\_01160577.Photobacterium sp SRA33/690-760  
YP\_927606.Shewanella amazonensis S82/690-774  
YP\_001554832.Shewanella baltica OS195/690-769  
YP\_001050432.Shewanella baltica OS195/690-769  
YP\_963331.Shewanella sp W3\_18\_1/690-769  
YP\_734050.Shewanella sp MR\_4/716-800  
YP\_738104.Shewanella sp MR\_7/716-800  
YP\_869609.Shewanella sp ANA\_3/690-774  
YP\_562954.Shewanella denitrificans OS217/690-769  
YP\_002311810.Shewanella piezotolerans WP3/690-769  
ZP\_02156186.Shewanella benthica K799/690-769  
ZP\_04716873.Alteromonas macleodii ATCC\_27126/690-769  
YP\_662040.Pseudoalteromonas atlantica T6c/690-769  
ZP\_01614517.Alteromonadales bacterium W\_7/692-768  
YP\_332939.Pseudoalteromonas haloplaxii TAC125/692-776  
ZP\_01215928.Psychromonas sp CNPT3/691-775  
YP\_856853.Aeromonas hydrophila subsp hydrophila ATCC\_7966/691-788  
YP\_001147170.Aeromonas salmonicida subsp salmonicida A449/691-798  
YP\_003466665.Xenorhabdus bovienii SS 204/691-763

[illegible]

**Multiple sequence alignment of partial gyrase A proteins from *Xanthomonas albilineans* and other gamma-proteobacteria.** The 43 amino acid insert, which was previously reported to be unique to *X. albilineans*, is highlighted in yellow.
