# Supplementary material for: Draft Genome Sequences of Xanthomonas sacchari and Two Banana-Associated Xanthomonads Reveal Insights into the Xanthomonas Group 1 Clade
Source: MDPI journal article supplement (doi:10.3390/genes2041050), 2011-12-02
Supplement: s1 [file s1]

| Gene                                                                                                                                  | Location                    | NCPB1131 | NCPB1132 | NCPB4393 |
|---------------------------------------------------------------------------------------------------------------------------------------|-----------------------------|----------|----------|----------|
| fig 487528.5.peg.1873 Endonuclease precursor                                                                                          | AGHZ01000430.1:6749..9697   | ✗ 0.00   | ✓ 1.00   | ✗ 0.00   |
| fig 487528.5.peg.2750 hypothetical protein                                                                                            | AGHZ01000185.1:3393..2107   | ✗ 0.00   | ✓ 1.00   | ✗ 0.00   |
| fig 487528.5.peg.355 hypothetical protein                                                                                             | AGHZ01001350.1:49..264      | ✗ 0.00   | ✓ 1.00   | ✓ 0.74   |
| fig 487528.5.peg.3712 possible DNA helicase                                                                                           | AGHZ01000018.1:19825..17969 | ✗ 0.01   | ✓ 1.00   | ✗ 0.00   |
| fig 487528.5.peg.81 hypothetical protein                                                                                              | AGHZ01001647.1:6083..6559   | ✗ 0.01   | ✓ 1.00   | ✗ 0.32   |
| fig 487528.5.peg.2533 hypothetical protein                                                                                            | AGHZ01000243.1:3863..4087   | ✗ 0.01   | ✓ 1.00   | ✓ 0.95   |
| fig 487528.5.peg.3373 Salicylate hydroxylase (EC 1.14.13.1);Ontology_term=KEGG_ENZYME:1.14.13.1                                       | AGHZ01000076.1:1278..2219   | ✗ 0.01   | ✓ 1.00   | ✓ 0.80   |
| fig 487528.5.peg.2172 hypothetical protein                                                                                            | AGHZ01000340.1:5995..5240   | ✗ 0.01   | ✓ 1.00   | ✓ 1.00   |
| fig 487528.5.peg.2574 hypothetical protein                                                                                            | AGHZ01000230.1:4437..4282   | ✗ 0.01   | ✓ 1.00   | ✓ 1.00   |
| fig 487528.5.peg.2588 Type I restriction-modification system2C specificity subunit S (EC 3.1.21.3);Ontology_term=KEGG_ENZYME:3.1.21.3 | AGHZ01000227.1:6618..7931   | ✗ 0.01   | ✓ 1.00   | ✗ 0.00   |
| fig 487528.5.peg.1756 hypothetical protein                                                                                            | AGHZ01000472.1:536..408     | ✗ 0.02   | ✓ 1.00   | ⚠ 0.43   |
| fig 487528.5.peg.3312 hypothetical protein                                                                                            | AGHZ01000085.1:756..5105    | ✗ 0.02   | ✓ 1.00   | ✗ 0.00   |
| fig 487528.5.peg.3272 Long-chain-fatty-acid--CoA ligase (EC 6.2.1.3);Ontology_term=KEGG_ENZYME:6.2.1.3                                | AGHZ01000092.1:14450..10332 | ✗ 0.02   | ✓ 1.00   | ✗ 0.00   |
| fig 487528.5.peg.3454 oxidoreductase                                                                                                  | AGHZ01000057.1:1513..206    | ✗ 0.02   | ✓ 1.00   | ✗ 0.18   |
| fig 487528.5.peg.110 hypothetical protein                                                                                             | AGHZ01001628.1:1561..1707   | ✗ 0.02   | ✓ 1.00   | ✓ 1.00   |
| fig 487528.5.peg.2398 hypothetical protein                                                                                            | AGHZ01000282.1:1426..1554   | ✗ 0.02   | ✓ 1.00   | ✓ 1.00   |
| fig 487528.5.peg.1592 TonB-dependent receptor                                                                                         | AGHZ01000534.1:3864..6755   | ✗ 0.02   | ✓ 1.00   | ✗ 0.00   |
| fig 487528.5.peg.1489 TonB-dependent receptor                                                                                         | AGHZ01000581.1:3632..747    | ✗ 0.02   | ✓ 1.00   | ✗ 0.00   |
| fig 487528.5.peg.3601 TonB-dependent receptor                                                                                         | AGHZ01000037.1:5760..8672   | ✗ 0.02   | ✓ 1.00   | ✓ 1.00   |
| fig 487528.5.peg.2849 Acetyltransferase2C GNAT family (EC 2.3.1.-);Ontology_term=KEGG_ENZYME:2.3.1.-                                  | AGHZ01000168.1:7188..7760   | ✗ 0.02   | ✓ 1.00   | ✓ 0.99   |
| fig 487528.5.peg.2897 TonB-dependent receptor                                                                                         | AGHZ01000158.1:7420..4730   | ✗ 0.03   | ✓ 1.00   | ✓ 0.99   |
| fig 487528.5.peg.2705 hypothetical protein                                                                                            | AGHZ01000191.1:435..319     | ✗ 0.03   | ✓ 1.00   | ✓ 1.00   |
| fig 487528.5.peg.3646 TonB-dependent receptor                                                                                         | AGHZ01000030.1:165..2849    | ✗ 0.03   | ✓ 1.00   | ✓ 1.00   |
| fig 487528.5.peg.2496 hypothetical protein                                                                                            | AGHZ01000255.1:3442..812    | ✗ 0.03   | ✓ 1.00   | ✗ 0.00   |
| fig 487528.5.peg.785 hypothetical protein                                                                                             | AGHZ01000951.1:40..153      | ✗ 0.03   | ✓ 1.00   | ✓ 1.00   |
| fig 487528.5.peg.626 hypothetical protein                                                                                             | AGHZ01001049.1:5232..4849   | ✗ 0.03   | ✓ 1.00   | ✗ 0.19   |
| fig 487528.5.peg.3747 glycosyl transferase2C family 2                                                                                 | AGHZ01000013.1:15898..13601 | ✗ 0.03   | ✓ 1.00   | ✗ 0.00   |
| fig 487528.5.peg.3375 Penicillin amidase family protein                                                                               | AGHZ01000076.1:7196..4881   | ✗ 0.03   | ✓ 1.00   | ✗ 0.00   |
| fig 487528.5.peg.3713 FIG00901053: hypothetical protein                                                                               | AGHZ01000018.1:22121..19827 | ✗ 0.03   | ✓ 1.00   | ✗ 0.00   |
| fig 487528.5.peg.2791 FIG01211915: hypothetical protein                                                                               | AGHZ01000177.1:2..2281      | ✗ 0.03   | ✓ 1.00   | ✓ 0.99   |
| fig 487528.5.peg.3628 FIG00955472: hypothetical protein                                                                               | AGHZ01000033.1:11261..13465 | ✗ 0.03   | ✓ 1.00   | ✗ 0.00   |
| fig 487528.5.peg.3720 colicin V secretion ABC transporter ATP-binding protein                                                         | AGHZ01000017.1:8962..6851   | ✗ 0.03   | ✓ 1.00   | ✗ 0.00   |
| fig 487528.5.peg.2468 ADP-ribosylglycohydrolase                                                                                       | AGHZ01000263.1:5369..5746   | ✗ 0.03   | ✓ 1.00   | ✗ 0.03   |
| fig 487528.5.peg.1944 hypothetical protein                                                                                            | AGHZ01000411.1:895..437     | ✗ 0.03   | ✓ 1.00   | ✓ 1.00   |
| fig 487528.5.peg.3409 Glucoamylase (EC 3.2.1.3);Ontology_term=KEGG_ENZYME:3.2.1.3                                                     | AGHZ01000069.1:5825..3972   | ✗ 0.04   | ✓ 1.00   | ✓ 1.00   |
| fig 487528.5.peg.2432 hypothetical protein                                                                                            | AGHZ01000277.1:6394..4532   | ✗ 0.04   | ✓ 1.00   | ✗ 0.00   |
| fig 487528.5.peg.3104 Phage T7 exclusion protein                                                                                      | AGHZ01000119.1:8202..9974   | ✗ 0.04   | ✓ 1.00   | ✗ 0.00   |
| fig 487528.5.peg.2169 FIG01211701: hypothetical protein                                                                               | AGHZ01000340.1:3540..1846   | ✗ 0.04   | ✓ 1.00   | ✓ 1.00   |
| fig 487528.5.peg.2173 coproporphyrinogen III oxidase2C putative                                                                       | AGHZ01000340.1:7350..6001   | ✗ 0.04   | ✓ 1.00   | ✓ 1.00   |
| fig 487528.5.peg.1878 DNA-cytosine methyltransferase (EC 2.1.1.37);Ontology_term=KEGG_ENZYME:2.1.1.37                                 | AGHZ01000430.1:16626..15022 | ✗ 0.04   | ✓ 1.00   | ✗ 0.00   |
| fig 487528.5.peg.2422 hypothetical protein                                                                                            | AGHZ01000278.1:2879..3109   | ✗ 0.04   | ✓ 1.00   | ⚠ 0.65   |
| fig 487528.5.peg.2784 protease                                                                                                        | AGHZ01000178.1:11744..13327 | ✗ 0.04   | ✓ 1.00   | ✗ 0.00   |
| fig 487528.5.peg.3647 flavin monoamine oxidase-related protein                                                                        | AGHZ01000030.1:3058..4632   | ✗ 0.04   | ✓ 1.00   | ✓ 1.00   |

|                                                                                                                |                             |   |      |   |      |   |      |
|----------------------------------------------------------------------------------------------------------------|-----------------------------|---|------|---|------|---|------|
| fig 487528.5.peg.1872 FIG00715517: hypothetical protein                                                        | AGHZ01000430.1:5235..6752   | ✗ | 0.05 | ✓ | 1.00 | ✗ | 0.00 |
| fig 487528.5.peg.2621 Rrf2-linked NADH-flavin reductase                                                        | AGHZ01000218.1:3386..3841   | ✗ | 0.05 | ✓ | 1.00 | ✗ | 0.00 |
| fig 487528.5.peg.3666 hypothetical protein                                                                     | AGHZ01000027.1:9039..8911   | ✗ | 0.05 | ✓ | 1.00 | ✓ | 1.00 |
| fig 487528.5.peg.645 tRNA(Ile)-lysine synthetase                                                               | AGHZ01001036.1:609..358     | ✗ | 0.05 | ✓ | 1.00 | ✓ | 1.00 |
| fig 487528.5.peg.2658 hypothetical protein                                                                     | AGHZ01000210.1:2120..684    | ✗ | 0.05 | ✓ | 1.00 | ✓ | 0.96 |
| fig 487528.5.peg.3704 hypothetical protein                                                                     | AGHZ01000018.1:5538..5723   | ✗ | 0.05 | ✓ | 1.00 | ✓ | 1.00 |
| fig 487528.5.peg.2623 drug resistance transporter2C EmrB/QacA subfamily                                        | AGHZ01000218.1:4651..6054   | ✗ | 0.05 | ✓ | 1.00 | ✗ | 0.00 |
| fig 487528.5.peg.2640 HipA protein                                                                             | AGHZ01000214.1:2290..3603   | ✗ | 0.05 | ✓ | 1.00 | ✗ | 0.00 |
| fig 487528.5.peg.3741 FIG01211631: hypothetical protein                                                        | AGHZ01000013.1:3159..4349   | ✗ | 0.06 | ✓ | 1.00 | ✗ | 0.00 |
| fig 487528.5.peg.1590 prolyl oligopeptidase family protein                                                     | AGHZ01000534.1:1222..3219   | ✗ | 0.07 | ✓ | 1.00 | ✗ | 0.00 |
| fig 487528.5.peg.3766 alginate biosynthesis protein                                                            | AGHZ01000009.1:6082..5087   | ✗ | 0.07 | ✓ | 1.00 | ✗ | 0.00 |
| fig 487528.5.peg.1979 site-specific recombinase                                                                | AGHZ01000400.1:3200..2247   | ✗ | 0.07 | ✓ | 1.00 | ✗ | 0.00 |
| fig 487528.5.peg.3500 plasmid mobilization protein                                                             | AGHZ01000049.1:13040..14680 | ✗ | 0.08 | ✓ | 1.00 | ✗ | 0.00 |
| fig 487528.5.peg.2113 phage-related integrase                                                                  | AGHZ01000356.1:10633..12363 | ✗ | 0.10 | ✓ | 1.00 | ✗ | 0.00 |
| fig 487528.5.peg.3564 hypothetical protein                                                                     | AGHZ01000039.1:6265..7047   | ✗ | 0.10 | ✓ | 1.00 | ✗ | 0.00 |
| fig 487528.5.peg.3106 FIG014574: hypothetical protein                                                          | AGHZ01000119.1:11375..12025 | ✗ | 0.11 | ✓ | 1.00 | ✗ | 0.00 |
| fig 487528.5.peg.2589 DNA repair protein RadC                                                                  | AGHZ01000227.1:8249..7950   | ✗ | 0.11 | ✓ | 1.00 | ✗ | 0.00 |
| fig 487528.5.peg.2384 hypothetical protein                                                                     | AGHZ01000285.1:7172..7339   | ✗ | 0.17 | ✓ | 1.00 | ✗ | 0.00 |
| fig 487528.5.peg.3460 Glucose-1-phosphate thymidyltransferase (EC 2.7.7.24);Ontology_term=KEGG_ENZYME:2.7.7.24 | AGHZ01000057.1:7050..7937   | ✗ | 0.19 | ✓ | 1.00 | ✗ | 0.00 |
| fig 487528.5.peg.2056 hypothetical protein                                                                     | AGHZ01000377.1:8485..8207   | ✗ | 0.25 | ✓ | 1.00 | ✗ | 0.00 |
| fig 487528.5.peg.3663 hypothetical protein                                                                     | AGHZ01000027.1:6036..5761   | ✗ | 0.25 | ✓ | 1.00 | ✗ | 0.00 |
| fig 487528.5.peg.3111 hypothetical protein                                                                     | AGHZ01000119.1:16761..17027 | ✗ | 0.26 | ✓ | 1.00 | ✗ | 0.00 |
| fig 487528.5.peg.3745 hypothetical protein                                                                     | AGHZ01000013.1:10920..10762 | ⚠ | 0.36 | ✓ | 1.00 | ✗ | 0.00 |
| fig 487528.5.peg.1442 hypothetical protein                                                                     | AGHZ01000604.1:2290..1619   | ⚠ | 0.44 | ✓ | 1.00 | ✗ | 0.00 |
| fig 487528.5.peg.2724 FIG01209702: hypothetical protein                                                        | AGHZ01000190.1:12080..12337 | ⚠ | 0.45 | ✓ | 1.00 | ✗ | 0.00 |
| fig 487528.5.peg.2380 Sensory box sensor histidine kinase/response regulator                                   | AGHZ01000285.1:2216..4273   | ⚠ | 0.49 | ✓ | 1.00 | ✗ | 0.00 |
| fig 487528.5.peg.231 Transcriptional regulator2C AraC family                                                   | AGHZ01001522.1:7359..7883   | ⚠ | 0.54 | ✓ | 1.00 | ✗ | 0.00 |
| fig 487528.5.peg.2532 hypothetical protein                                                                     | AGHZ01000243.1:2755..3126   | ⚠ | 0.59 | ✓ | 1.00 | ✗ | 0.00 |
| fig 487528.5.peg.3461 dTDP-4-dehydrorhamnose 32C5-epimerase (EC 5.1.3.13);Ontology_term=KEGG_ENZYME:5.1.3.13   | AGHZ01000057.1:7934..8491   | ⚠ | 0.63 | ✓ | 1.00 | ✗ | 0.00 |
| fig 487528.5.peg.2788 hypothetical protein                                                                     | AGHZ01000178.1:19219..19085 | ⚠ | 0.64 | ✓ | 1.00 | ✗ | 0.00 |
| fig 487528.5.peg.2215 Hypothetical ABC transport system2C periplasmic component                                | AGHZ01000332.1:861..184     | ✓ | 0.69 | ✓ | 1.00 | ✗ | 0.00 |
| fig 487528.5.peg.2266 conserved hypothetical protein                                                           | AGHZ01000320.1:5582..5175   | ✓ | 0.73 | ✓ | 1.00 | ✗ | 0.00 |
| fig 487528.5.peg.2381 hypothetical protein                                                                     | AGHZ01000285.1:4726..4340   | ✓ | 0.75 | ✓ | 1.00 | ✗ | 0.00 |
| fig 487528.5.peg.2531 hypothetical protein                                                                     | AGHZ01000243.1:2407..2751   | ✓ | 0.77 | ✓ | 1.00 | ✗ | 0.00 |
| fig 487528.5.peg.1881 Putative outer membrane or secreted lipoprotein                                          | AGHZ01000429.1:435..1196    | ✓ | 0.77 | ✓ | 1.00 | ✗ | 0.00 |
| fig 487528.5.peg.2297 YoeB toxin protein                                                                       | AGHZ01000312.1:1335..1589   | ✓ | 0.78 | ✓ | 1.00 | ✗ | 0.00 |
| fig 487528.5.peg.1441 Transcriptional regulator2C LysR family                                                  | AGHZ01000604.1:474..1565    | ✓ | 0.81 | ✓ | 1.00 | ✗ | 0.00 |
| fig 487528.5.peg.2267 Transcriptional regulator2C AraC family                                                  | AGHZ01000320.1:6495..5638   | ✓ | 0.84 | ✓ | 1.00 | ✗ | 0.00 |
| fig 487528.5.peg.3044 hypothetical protein                                                                     | AGHZ01000133.1:2305..2601   | ✓ | 0.86 | ✓ | 1.00 | ✗ | 0.02 |
| fig 487528.5.peg.2382 hypothetical protein                                                                     | AGHZ01000285.1:5093..5746   | ✓ | 0.89 | ✓ | 1.00 | ✗ | 0.00 |
| fig 487528.5.peg.910 TonB-dependent receptor                                                                   | AGHZ01000865.1:13564..10685 | ✓ | 0.92 | ✓ | 1.00 | ✗ | 0.03 |
| fig 487528.5.peg.1321 hypothetical protein                                                                     | AGHZ01000671.1:1099..1359   | ✓ | 1.00 | ✓ | 1.00 | ✗ | 0.00 |
| fig 487528.5.peg.2385 hypothetical protein                                                                     | AGHZ01000285.1:7547..8146   | ✓ | 1.00 | ✓ | 1.00 | ✗ | 0.00 |
| fig 487528.5.peg.678 hypothetical protein                                                                      | AGHZ01001021.1:5016..5879   | ✓ | 1.00 | ✓ | 1.00 | ✗ | 0.00 |
