# Supplementary material for: Draft Genome Sequences of Xanthomonas sacchari and Two Banana-Associated Xanthomonads Reveal Insights into the Xanthomonas Group 1 Clade
Source: MDPI journal article supplement (doi:10.3390/genes2041050), 2011-12-02
Supplement: s1 [file s1]

# NCPB1131 predicted genes

| Gene                                                                                  | Location                  | NCPB1131 | NCPB1132 | NCPB4393 |
|---------------------------------------------------------------------------------------|---------------------------|----------|----------|----------|
| fig 487527.6.peg.2266 hypothetical protein                                            | AGHY01000542.1:8..121     | 0.96     | 0.00     | 0.00     |
| fig 487527.6.peg.2784 Threonine dehydrogenase and related Zn-dependent dehydrogenases | AGHY01000264.1:8..259     | 0.99     | 0.03     | 0.35     |
| fig 487527.6.peg.1031 hypothetical protein                                            | AGHY01001470.1:1004..606  | 1.00     | 0.00     | 0.00     |
| fig 487527.6.peg.1085 hypothetical protein                                            | AGHY01001422.1:545..390   | 1.00     | 0.00     | 0.00     |
| fig 487527.6.peg.1086 Esterase/lipase                                                 | AGHY01001422.1:486..1571  | 1.00     | 0.00     | 0.00     |
| fig 487527.6.peg.1132 hypothetical protein                                            | AGHY01001378.1:2316..2071 | 1.00     | 0.00     | 0.00     |
| fig 487527.6.peg.1195 hypothetical protein                                            | AGHY01001320.1:1503..1682 | 1.00     | 0.00     | 0.00     |
| fig 487527.6.peg.1196 hypothetical protein                                            | AGHY01001319.1:406..218   | 1.00     | 0.00     | 0.00     |
| fig 487527.6.peg.1207 hypothetical protein                                            | AGHY01001311.1:490..855   | 1.00     | 0.00     | 0.00     |
| fig 487527.6.peg.1315 hypothetical protein                                            | AGHY01001234.1:43..240    | 1.00     | 0.00     | 0.00     |
| fig 487527.6.peg.1322 FIG053235: Diacylglycerolamine hydrolase like                   | AGHY01001230.1:103..765   | 1.00     | 0.00     | 0.00     |
| fig 487527.6.peg.1342 hypothetical protein                                            | AGHY01001219.1:600..448   | 1.00     | 0.00     | 0.00     |
| fig 487527.6.peg.1389 hypothetical protein                                            | AGHY01001179.1:232..107   | 1.00     | 0.00     | 0.00     |
| fig 487527.6.peg.1422 hypothetical protein                                            | AGHY01001149.1:476..898   | 1.00     | 0.00     | 0.00     |
| fig 487527.6.peg.1450 FIG01210434: hypothetical protein                               | AGHY01001129.1:1515..2027 | 1.00     | 0.00     | 0.00     |
| fig 487527.6.peg.1480 hypothetical protein                                            | AGHY01001108.1:139..26    | 1.00     | 0.00     | 0.00     |
| fig 487527.6.peg.1481 hypothetical protein                                            | AGHY01001108.1:138..323   | 1.00     | 0.00     | 0.00     |
| fig 487527.6.peg.1589 Transcriptional regulator2C AraC family                         | AGHY01001017.1:1085..75   | 1.00     | 0.00     | 0.00     |
| fig 487527.6.peg.1590 hypothetical protein                                            | AGHY01001017.1:1427..1293 | 1.00     | 0.00     | 0.00     |
| fig 487527.6.peg.1606 Manganese transport protein MntH                                | AGHY01001004.1:832..455   | 1.00     | 0.00     | 0.00     |
| fig 487527.6.peg.1612 hypothetical protein                                            | AGHY01001000.1:2942..2775 | 1.00     | 0.00     | 0.00     |
| fig 487527.6.peg.1704 hypothetical protein                                            | AGHY01000923.1:319..155   | 1.00     | 0.00     | 0.00     |
| fig 487527.6.peg.1764 hypothetical protein                                            | AGHY01000886.1:3658..3482 | 1.00     | 0.00     | 0.00     |
| fig 487527.6.peg.1811 hypothetical protein                                            | AGHY01000856.1:279..413   | 1.00     | 0.00     | 0.00     |
| fig 487527.6.peg.1830 hypothetical protein                                            | AGHY01000845.1:1520..1654 | 1.00     | 0.00     | 0.00     |
| fig 487527.6.peg.1831 hypothetical protein                                            | AGHY01000845.1:4111..3953 | 1.00     | 0.00     | 0.00     |
| fig 487527.6.peg.1837 hypothetical protein                                            | AGHY01000843.1:1017..859  | 1.00     | 0.00     | 0.00     |
| fig 487527.6.peg.1870 hypothetical protein                                            | AGHY01000821.1:167..6     | 1.00     | 0.00     | 0.00     |
| fig 487527.6.peg.1874 transcriptional regulator                                       | AGHY01000821.1:3742..3074 | 1.00     | 0.00     | 0.00     |
| fig 487527.6.peg.1875 putative%3B ORF located using Glimmer/Genemark                  | AGHY01000821.1:3885..4151 | 1.00     | 0.00     | 0.00     |
| fig 487527.6.peg.1891 hypothetical protein                                            | AGHY01000810.1:278..123   | 1.00     | 0.00     | 0.00     |
| fig 487527.6.peg.1913 hypothetical protein                                            | AGHY01000789.1:631..20    | 1.00     | 0.00     | 0.00     |
| fig 487527.6.peg.1922 hypothetical protein                                            | AGHY01000783.1:1401..1514 | 1.00     | 0.00     | 0.00     |
| fig 487527.6.peg.1923 BatD                                                            | AGHY01000783.1:2057..1773 | 1.00     | 0.00     | 0.00     |
| fig 487527.6.peg.1926 hypothetical protein                                            | AGHY01000782.1:1718..2470 | 1.00     | 0.00     | 0.00     |
| fig 487527.6.peg.1948 hypothetical protein                                            | AGHY01000771.1:2997..2065 | 1.00     | 0.00     | 0.00     |
| fig 487527.6.peg.1949 hypothetical protein                                            | AGHY01000771.1:3344..2997 | 1.00     | 0.00     | 0.00     |
| fig 487527.6.peg.1951 hypothetical protein                                            | AGHY01000770.1:53..238    | 1.00     | 0.00     | 0.00     |
| fig 487527.6.peg.1979 hypothetical protein                                            | AGHY01000749.1:704..537   | 1.00     | 0.00     | 0.00     |
| fig 487527.6.peg.1989 hypothetical protein                                            | AGHY01000738.1:1296..1508 | 1.00     | 0.00     | 0.00     |
| fig 487527.6.peg.1991 hypothetical protein                                            | AGHY01000738.1:2830..2375 | 1.00     | 0.00     | 0.00     |
| fig 487527.6.peg.2027 Glycosyl transferase2C family 2                                 | AGHY01000705.1:337..1200  | 1.00     | 0.00     | 0.00     |
| fig 487527.6.peg.2028 Glycosyl transferase2C family 2                                 | AGHY01000705.1:1164..2219 | 1.00     | 0.00     | 0.00     |

# NCPB1131 predicted genes

|                                                                                                |                           |   |      |   |      |   |      |
|------------------------------------------------------------------------------------------------|---------------------------|---|------|---|------|---|------|
| fig 487527.6.peg.2068 hypothetical protein                                                     | AGHY01000686.1:1236..1571 | ✓ | 1.00 | ✗ | 0.00 | ✗ | 0.00 |
| fig 487527.6.peg.2112 putative MarR family transcriptional regulator                           | AGHY01000658.1:746..1213  | ✓ | 1.00 | ✗ | 0.00 | ✗ | 0.00 |
| fig 487527.6.peg.2136 Transcriptional regulator2C MarR family                                  | AGHY01000640.1:985..1398  | ✓ | 1.00 | ✗ | 0.00 | ✗ | 0.00 |
| fig 487527.6.peg.2139 hypothetical protein                                                     | AGHY01000638.1:487..371   | ✓ | 1.00 | ✗ | 0.00 | ✗ | 0.00 |
| fig 487527.6.peg.2186 hypothetical protein                                                     | AGHY01000596.1:2325..1708 | ✓ | 1.00 | ✗ | 0.00 | ✗ | 0.00 |
| fig 487527.6.peg.2187 lipase2C class 3                                                         | AGHY01000596.1:3416..2394 | ✓ | 1.00 | ✗ | 0.00 | ✗ | 0.00 |
| fig 487527.6.peg.2306 Methyl-accepting chemotaxis protein I (serine chemoreceptor protein)     | AGHY01000523.1:1639..119  | ✓ | 1.00 | ✗ | 0.00 | ✗ | 0.00 |
| fig 487527.6.peg.2307 hypothetical protein                                                     | AGHY01000523.1:1869..2702 | ✓ | 1.00 | ✗ | 0.00 | ✗ | 0.00 |
| fig 487527.6.peg.2308 hypothetical protein                                                     | AGHY01000523.1:2699..2935 | ✓ | 1.00 | ✗ | 0.00 | ✗ | 0.00 |
| fig 487527.6.peg.2373 hypothetical protein                                                     | AGHY01000482.1:2736..2849 | ✓ | 1.00 | ✗ | 0.00 | ✗ | 0.00 |
| fig 487527.6.peg.2374 hypothetical protein                                                     | AGHY01000482.1:2860..3294 | ✓ | 1.00 | ✗ | 0.00 | ✗ | 0.00 |
| fig 487527.6.peg.2380 hypothetical protein                                                     | AGHY01000480.1:1655..1774 | ✓ | 1.00 | ✗ | 0.00 | ✗ | 0.00 |
| fig 487527.6.peg.2387 hypothetical protein                                                     | AGHY01000477.1:1926..1798 | ✓ | 1.00 | ✗ | 0.00 | ✗ | 0.00 |
| fig 487527.6.peg.2390 hypothetical protein                                                     | AGHY01000476.1:146..6     | ✓ | 1.00 | ✗ | 0.00 | ✗ | 0.00 |
| fig 487527.6.peg.2421 extracellular protease( EC:3.4.21.- );Ontology_term=KEGG_ENZYME:3.4.21.- | AGHY01000456.1:115..1941  | ✓ | 1.00 | ✗ | 0.00 | ✗ | 0.00 |
| fig 487527.6.peg.2445 hypothetical protein                                                     | AGHY01000444.1:2287..1541 | ✓ | 1.00 | ✗ | 0.00 | ✗ | 0.00 |
| fig 487527.6.peg.2475 hypothetical protein                                                     | AGHY01000425.1:33..170    | ✓ | 1.00 | ✗ | 0.00 | ✗ | 0.00 |
| fig 487527.6.peg.2484 hypothetical protein                                                     | AGHY01000420.1:605..207   | ✓ | 1.00 | ✗ | 0.00 | ✗ | 0.00 |
| fig 487527.6.peg.2611 hypothetical protein                                                     | AGHY01000365.1:1825..1622 | ✓ | 1.00 | ✗ | 0.00 | ✗ | 0.00 |
| fig 487527.6.peg.263 hypothetical protein                                                      | AGHY01002495.1:921..1178  | ✓ | 1.00 | ✗ | 0.00 | ✗ | 0.00 |
| fig 487527.6.peg.2641 hypothetical protein                                                     | AGHY01000351.1:1484..507  | ✓ | 1.00 | ✗ | 0.00 | ✗ | 0.00 |
| fig 487527.6.peg.2711 Putative translation initiation inhibitor2C yjgF family                  | AGHY01000307.1:1314..643  | ✓ | 1.00 | ✗ | 0.00 | ✗ | 0.00 |
| fig 487527.6.peg.2733 Membrane-fusion protein                                                  | AGHY01000288.1:1929..2972 | ✓ | 1.00 | ✗ | 0.00 | ✗ | 0.00 |
| fig 487527.6.peg.2734 colicin V secretion ABC transporter ATP-binding protein                  | AGHY01000288.1:3026..3793 | ✓ | 1.00 | ✗ | 0.00 | ✗ | 0.00 |
| fig 487527.6.peg.2735 colicin V secretion ABC transporter ATP-binding protein                  | AGHY01000288.1:3847..5139 | ✓ | 1.00 | ✗ | 0.00 | ✗ | 0.00 |
| fig 487527.6.peg.2736 hypothetical protein                                                     | AGHY01000288.1:5226..5342 | ✓ | 1.00 | ✗ | 0.00 | ✗ | 0.00 |
| fig 487527.6.peg.2739 hypothetical protein                                                     | AGHY01000287.1:2136..2252 | ✓ | 1.00 | ✗ | 0.00 | ✗ | 0.00 |
| fig 487527.6.peg.2740 hypothetical protein                                                     | AGHY01000287.1:2401..2249 | ✓ | 1.00 | ✗ | 0.00 | ✗ | 0.00 |
| fig 487527.6.peg.2774 hypothetical protein                                                     | AGHY01000270.1:931..677   | ✓ | 1.00 | ✗ | 0.00 | ✗ | 0.00 |
| fig 487527.6.peg.2815 Ribosomal protein S4 and related proteins                                | AGHY01000250.1:557..24    | ✓ | 1.00 | ✗ | 0.00 | ✗ | 0.00 |
| fig 487527.6.peg.2816 Transcriptional regulator2C LysR family                                  | AGHY01000250.1:676..1632  | ✓ | 1.00 | ✗ | 0.00 | ✗ | 0.00 |
| fig 487527.6.peg.2817 Histone acetyltransferase HPA2 and related acetyltransferases            | AGHY01000250.1:2176..1673 | ✓ | 1.00 | ✗ | 0.00 | ✗ | 0.00 |
| fig 487527.6.peg.2830 hypothetical protein                                                     | AGHY01000245.1:376..723   | ✓ | 1.00 | ✗ | 0.00 | ✗ | 0.00 |
| fig 487527.6.peg.2831 hypothetical protein                                                     | AGHY01000245.1:1032..880  | ✓ | 1.00 | ✗ | 0.00 | ✗ | 0.00 |
| fig 487527.6.peg.2836 hypothetical protein                                                     | AGHY01000239.1:814..1854  | ✓ | 1.00 | ✗ | 0.00 | ✗ | 0.00 |
| fig 487527.6.peg.2848 hypothetical protein                                                     | AGHY01000232.1:3072..3230 | ✓ | 1.00 | ✗ | 0.00 | ✗ | 0.00 |
| fig 487527.6.peg.2866 hypothetical protein                                                     | AGHY01000219.1:3..185     | ✓ | 1.00 | ✗ | 0.00 | ✗ | 0.00 |
| fig 487527.6.peg.2893 Transcriptional regulator2C LysR family                                  | AGHY01000210.1:1599..1381 | ✓ | 1.00 | ✗ | 0.00 | ✗ | 0.00 |
| fig 487527.6.peg.2924 COG0845: Membrane-fusion protein                                         | AGHY01000193.1:2107..1772 | ✓ | 1.00 | ✗ | 0.00 | ✗ | 0.00 |
| fig 487527.6.peg.2976 hypothetical protein                                                     | AGHY01000166.1:4257..4370 | ✓ | 1.00 | ✗ | 0.00 | ✗ | 0.00 |
| fig 487527.6.peg.2977 transcriptional regulator2C MarR family                                  | AGHY01000166.1:4665..4399 | ✓ | 1.00 | ✗ | 0.00 | ✗ | 0.00 |
| fig 487527.6.peg.3048 Oxidoreductase2C short chain dehydrogenase/reductase family              | AGHY01000128.1:3011..4216 | ✓ | 1.00 | ✗ | 0.00 | ✗ | 0.00 |
| fig 487527.6.peg.3075 hypothetical protein                                                     | AGHY01000119.1:2141..1986 | ✓ | 1.00 | ✗ | 0.00 | ✗ | 0.00 |
| fig 487527.6.peg.3084 FIG01212420: hypothetical protein                                        | AGHY01000116.1:2363..1359 | ✓ | 1.00 | ✗ | 0.00 | ✗ | 0.00 |

# NCPB1131 predicted genes

|                                                                                                                  |                             |   |      |   |      |   |      |
|------------------------------------------------------------------------------------------------------------------|-----------------------------|---|------|---|------|---|------|
| figl487527.6.peg.3085 FIG01212420: hypothetical protein                                                          | AGHY01000116.1:3752..2721   | ✓ | 1.00 | ✗ | 0.00 | ✗ | 0.00 |
| figl487527.6.peg.3100 Phosphoglycerate mutase                                                                    | AGHY01000108.1:1420..2040   | ✓ | 1.00 | ✗ | 0.00 | ✗ | 0.00 |
| figl487527.6.peg.3101 (Acyl-carrier protein) phosphodiesterase( EC:3.1.4.14 );Ontology_term=KEGG_ENZYME:3.1.4.14 | AGHY01000108.1:2621..2121   | ✓ | 1.00 | ✗ | 0.00 | ✗ | 0.00 |
| figl487527.6.peg.3102 hypothetical protein                                                                       | AGHY01000106.1:1513..1067   | ✓ | 1.00 | ✗ | 0.00 | ✗ | 0.00 |
| figl487527.6.peg.3157 hypothetical protein                                                                       | AGHY01000093.1:1587..1706   | ✓ | 1.00 | ✗ | 0.00 | ✗ | 0.00 |
| figl487527.6.peg.3158 Alpha-12C2-mannosidase                                                                     | AGHY01000092.1:38..265      | ✓ | 1.00 | ✗ | 0.00 | ✗ | 0.00 |
| figl487527.6.peg.3187 hypothetical protein                                                                       | AGHY01000079.1:1818..1946   | ✓ | 1.00 | ✗ | 0.00 | ✗ | 0.00 |
| figl487527.6.peg.3228 hypothetical protein                                                                       | AGHY01000063.1:647..967     | ✓ | 1.00 | ✗ | 0.00 | ✗ | 0.00 |
| figl487527.6.peg.3261 hypothetical protein                                                                       | AGHY01000048.1:1306..1470   | ✓ | 1.00 | ✗ | 0.00 | ✗ | 0.00 |
| figl487527.6.peg.3284 hypothetical protein                                                                       | AGHY01000042.1:1450..1325   | ✓ | 1.00 | ✗ | 0.00 | ✗ | 0.00 |
| figl487527.6.peg.3285 hypothetical protein                                                                       | AGHY01000042.1:1627..1508   | ✓ | 1.00 | ✗ | 0.00 | ✗ | 0.00 |
| figl487527.6.peg.3289 hypothetical protein                                                                       | AGHY01000042.1:4487..4203   | ✓ | 1.00 | ✗ | 0.00 | ✗ | 0.00 |
| figl487527.6.peg.3290 hypothetical protein                                                                       | AGHY01000042.1:4894..4493   | ✓ | 1.00 | ✗ | 0.00 | ✗ | 0.00 |
| figl487527.6.peg.3291 hypothetical protein                                                                       | AGHY01000042.1:6229..6011   | ✓ | 1.00 | ✗ | 0.00 | ✗ | 0.00 |
| figl487527.6.peg.3292 hypothetical protein                                                                       | AGHY01000042.1:6814..6485   | ✓ | 1.00 | ✗ | 0.00 | ✗ | 0.00 |
| figl487527.6.peg.3294 hypothetical protein                                                                       | AGHY01000042.1:8189..8061   | ✓ | 1.00 | ✗ | 0.00 | ✗ | 0.00 |
| figl487527.6.peg.3296 hypothetical protein                                                                       | AGHY01000042.1:9158..8955   | ✓ | 1.00 | ✗ | 0.00 | ✗ | 0.00 |
| figl487527.6.peg.33 hypothetical protein                                                                         | AGHY01003061.1:44..166      | ✓ | 1.00 | ✗ | 0.00 | ✗ | 0.00 |
| figl487527.6.peg.3334 hypothetical protein                                                                       | AGHY01000029.1:2986..1814   | ✓ | 1.00 | ✗ | 0.00 | ✗ | 0.00 |
| figl487527.6.peg.3338 O-antigen export system permease protein RfbD                                              | AGHY01000028.1:715..32      | ✓ | 1.00 | ✗ | 0.00 | ✗ | 0.00 |
| figl487527.6.peg.3339 FIG01212275: hypothetical protein                                                          | AGHY01000028.1:1242..922    | ✓ | 1.00 | ✗ | 0.00 | ✗ | 0.00 |
| figl487527.6.peg.3340 putative%3B ORF located using Glimmer/Genemark                                             | AGHY01000028.1:3181..1586   | ✓ | 1.00 | ✗ | 0.00 | ✗ | 0.00 |
| figl487527.6.peg.3374 hypothetical protein                                                                       | AGHY01000013.1:1955..273    | ✓ | 1.00 | ✗ | 0.00 | ✗ | 0.00 |
| figl487527.6.peg.35 hypothetical protein                                                                         | AGHY01003061.1:2380..2496   | ✓ | 1.00 | ✗ | 0.00 | ✗ | 0.00 |
| figl487527.6.peg.354 hypothetical protein                                                                        | AGHY01002323.1:149..6       | ✓ | 1.00 | ✗ | 0.00 | ✗ | 0.00 |
| figl487527.6.peg.430 luciferase-like                                                                             | AGHY01002215.1:684..520     | ✓ | 1.00 | ✗ | 0.00 | ✗ | 0.00 |
| figl487527.6.peg.448 hypothetical protein                                                                        | AGHY01002176.1:35..337      | ✓ | 1.00 | ✗ | 0.00 | ✗ | 0.00 |
| figl487527.6.peg.452 hypothetical protein                                                                        | AGHY01002170.1:388..609     | ✓ | 1.00 | ✗ | 0.00 | ✗ | 0.00 |
| figl487527.6.peg.520 hypothetical protein                                                                        | AGHY01002083.1:1851..2024   | ✓ | 1.00 | ✗ | 0.00 | ✗ | 0.00 |
| figl487527.6.peg.521 DUF378 domain-containing protein                                                            | AGHY01002083.1:2248..2009   | ✓ | 1.00 | ✗ | 0.00 | ✗ | 0.00 |
| figl487527.6.peg.530 hypothetical protein                                                                        | AGHY01002069.1:592..449     | ✓ | 1.00 | ✗ | 0.00 | ✗ | 0.00 |
| figl487527.6.peg.621 hypothetical protein                                                                        | AGHY01001947.1:759..908     | ✓ | 1.00 | ✗ | 0.00 | ✗ | 0.00 |
| figl487527.6.peg.796 methyl-accepting chemotaxis protein                                                         | AGHY01001732.1:595..152     | ✓ | 1.00 | ✗ | 0.00 | ✗ | 0.00 |
| figl487527.6.peg.803 hypothetical protein                                                                        | AGHY01001724.1:200..69      | ✓ | 1.00 | ✗ | 0.00 | ✗ | 0.00 |
| figl487527.6.peg.870 hypothetical protein                                                                        | AGHY01001648.1:563..856     | ✓ | 1.00 | ✗ | 0.00 | ✗ | 0.00 |
| figl487527.6.peg.961 hypothetical protein                                                                        | AGHY01001549.1:1507..1629   | ✓ | 1.00 | ✗ | 0.00 | ✗ | 0.00 |
| figl487527.6.peg.994 hypothetical protein                                                                        | AGHY01001511.1:877..1791    | ✓ | 1.00 | ✗ | 0.00 | ✗ | 0.00 |
| figl487527.6.peg.995 hypothetical protein                                                                        | AGHY01001510.1:417..127     | ✓ | 1.00 | ✗ | 0.00 | ✗ | 0.00 |
| figl487527.6.peg.411 hypothetical protein                                                                        | AGHY01002243.1:327..647     | ✓ | 1.00 | ✗ | 0.00 | ✗ | 0.04 |
| figl487527.6.peg.896 hypothetical protein                                                                        | AGHY01001605.1:167..376     | ✓ | 1.00 | ✗ | 0.00 | ✗ | 0.11 |
| figl487527.6.peg.3286 hypothetical protein                                                                       | AGHY01000042.1:2735..2610   | ✓ | 1.00 | ✗ | 0.00 | ✗ | 0.15 |
| figl487527.6.peg.2974 hypothetical protein                                                                       | AGHY01000166.1:2982..2671   | ✓ | 1.00 | ✗ | 0.00 | ✗ | 0.16 |
| figl487527.6.peg.3288 Zonular occludens toxin                                                                    | AGHY01000042.1:4203..3121   | ✓ | 1.00 | ✗ | 0.00 | ✗ | 0.17 |
| figl487527.6.peg.3219 Type IV fimbrial biogenesis protein PilX                                                   | AGHY01000070.1:12814..12605 | ✓ | 1.00 | ✗ | 0.00 | ✗ | 0.21 |

# NCPB1131 predicted genes

|                                                                                                                     |                             |   |      |   |      |   |      |
|---------------------------------------------------------------------------------------------------------------------|-----------------------------|---|------|---|------|---|------|
| figl487527.6.peg.1251 FIG01213967: hypothetical protein                                                             | AGHY01001281.1:3676..4467   | ✓ | 1.00 | ✗ | 0.00 | ✗ | 0.25 |
| figl487527.6.peg.3215 Type IV pilus biogenesis protein PilE                                                         | AGHY01000070.1:8781..8416   | ✓ | 1.00 | ✗ | 0.00 | ✗ | 0.28 |
| figl487527.6.peg.3218 Type IV fimbrial biogenesis protein PilY1                                                     | AGHY01000070.1:12543..11863 | ✓ | 1.00 | ✗ | 0.00 | ✗ | 0.29 |
| figl487527.6.peg.2857 hypothetical protein                                                                          | AGHY01000226.1:23..157      | ✓ | 1.00 | ✗ | 0.00 | ✗ | 0.30 |
| figl487527.6.peg.2881 hypothetical acetyltransferase                                                                | AGHY01000214.1:873..1355    | ✓ | 1.00 | ✗ | 0.00 | ✗ | 0.33 |
| figl487527.6.peg.2802 hypothetical protein                                                                          | AGHY01000255.1:1465..1220   | ✓ | 1.00 | ✗ | 0.00 | ⚠ | 0.35 |
| figl487527.6.peg.3217 Type IV fimbrial biogenesis protein PilY1                                                     | AGHY01000070.1:11866..10124 | ✓ | 1.00 | ✗ | 0.00 | ⚠ | 0.36 |
| figl487527.6.peg.3255 hypothetical protein                                                                          | AGHY01000052.1:6576..6376   | ✓ | 1.00 | ✗ | 0.00 | ⚠ | 0.41 |
| figl487527.6.peg.1761 hypothetical protein                                                                          | AGHY01000886.1:2100..1933   | ✓ | 1.00 | ✗ | 0.00 | ⚠ | 0.43 |
| figl487527.6.peg.2975 monooxygenase2C FAD-binding                                                                   | AGHY01000166.1:4253..2979   | ✓ | 1.00 | ✗ | 0.00 | ⚠ | 0.45 |
| figl487527.6.peg.3214 type 4 fimbrial biogenesis protein                                                            | AGHY01000070.1:7710..8201   | ✓ | 1.00 | ✗ | 0.00 | ⚠ | 0.46 |
| figl487527.6.peg.3293 Putative phage replication protein RstA                                                       | AGHY01000042.1:7763..6876   | ✓ | 1.00 | ✗ | 0.00 | ⚠ | 0.46 |
| figl487527.6.peg.1305 hypothetical protein                                                                          | AGHY01001244.1:4..216       | ✓ | 1.00 | ✗ | 0.00 | ⚠ | 0.48 |
| figl487527.6.peg.3287 hypothetical protein                                                                          | AGHY01000042.1:2993..2748   | ✓ | 1.00 | ✗ | 0.00 | ⚠ | 0.49 |
| figl487527.6.peg.690 hypothetical protein                                                                           | AGHY01001854.1:297..440     | ✓ | 1.00 | ✗ | 0.00 | ⚠ | 0.53 |
| figl487527.6.peg.1938 hypothetical protein                                                                          | AGHY01000774.1:2246..1026   | ✓ | 1.00 | ✗ | 0.00 | ⚠ | 0.57 |
| figl487527.6.peg.3254 prolyl oligopeptidase family protein                                                          | AGHY01000052.1:4118..6034   | ✓ | 1.00 | ✗ | 0.00 | ⚠ | 0.57 |
| figl487527.6.peg.3381 Chemotaxis protein methyltransferase CheR (EC 2.1.1.80);Ontology_term=KEGG_ENZYME:2.1.1.80    | AGHY01000011.1:732..490     | ✓ | 1.00 | ✗ | 0.00 | ⚠ | 0.58 |
| figl487527.6.peg.1349 hypothetical protein                                                                          | AGHY01001214.1:164..24      | ✓ | 1.00 | ✗ | 0.00 | ⚠ | 0.58 |
| figl487527.6.peg.1247 Major pilus subunit of type IV secretion complex2C VirB2                                      | AGHY01001281.1:280..675     | ✓ | 1.00 | ✗ | 0.00 | ⚠ | 0.64 |
| figl487527.6.peg.1428 RND efflux system2C membrane fusion protein CmeA                                              | AGHY01001145.1:1988..2203   | ✓ | 1.00 | ✗ | 0.00 | ⚠ | 0.65 |
| figl487527.6.peg.3315 hypothetical protein                                                                          | AGHY01000034.1:3906..3778   | ✓ | 1.00 | ✗ | 0.00 | ✓ | 0.67 |
| figl487527.6.peg.159 oxidoreductase                                                                                 | AGHY01002728.1:1258..800    | ✓ | 1.00 | ✗ | 0.00 | ✓ | 0.68 |
| figl487527.6.peg.3216 Type IV fimbrial biogenesis protein PilY1                                                     | AGHY01000070.1:9524..8838   | ✓ | 1.00 | ✗ | 0.00 | ✓ | 0.69 |
| figl487527.6.peg.3295 hypothetical protein                                                                          | AGHY01000042.1:8398..8246   | ✓ | 1.00 | ✗ | 0.00 | ✓ | 0.76 |
| figl487527.6.peg.3341 Phytoene desaturase (EC 1.14.99.-);Ontology_term=KEGG_ENZYME:1.14.99.-                        | AGHY01000028.1:3716..3201   | ✓ | 1.00 | ✗ | 0.00 | ✓ | 0.77 |
| figl487527.6.peg.810 Beta-ketoadipate enol-lactone hydrolase (EC 3.1.1.24);Ontology_term=KEGG_ENZYME:3.1.1.24       | AGHY01001712.1:735..595     | ✓ | 1.00 | ✗ | 0.00 | ✓ | 0.82 |
| figl487527.6.peg.2087 hypothetical protein                                                                          | AGHY01000672.1:1475..1305   | ✓ | 1.00 | ✗ | 0.00 | ✓ | 0.82 |
| figl487527.6.peg.925 hypothetical protein                                                                           | AGHY01001578.1:187..699     | ✓ | 1.00 | ✗ | 0.00 | ✓ | 0.83 |
| figl487527.6.peg.1814 Transcriptional regulator2C TetR family                                                       | AGHY01000854.1:109..348     | ✓ | 1.00 | ✗ | 0.00 | ✓ | 0.83 |
| figl487527.6.peg.2973 GCN5-related N-acetyltransferase                                                              | AGHY01000166.1:2146..2601   | ✓ | 1.00 | ✗ | 0.00 | ✓ | 0.86 |
| figl487527.6.peg.1440 3-oxoacyl-[acyl-carrier protein] reductase (EC 1.1.1.100);Ontology_term=KEGG_ENZYME:1.1.1.100 | AGHY01001137.1:1185..442    | ✓ | 1.00 | ✗ | 0.00 | ✓ | 0.87 |
| figl487527.6.peg.3382 Chemotaxis protein methyltransferase CheR (EC 2.1.1.80);Ontology_term=KEGG_ENZYME:2.1.1.80    | AGHY01000011.1:2663..705    | ✓ | 1.00 | ✗ | 0.00 | ✓ | 0.88 |
| figl487527.6.peg.1429 RND efflux system2C inner membrane transporter CmeB                                           | AGHY01001145.1:2213..2419   | ✓ | 1.00 | ✗ | 0.00 | ✓ | 0.88 |
| figl487527.6.peg.2757 Transcriptional regulatory protein RtcR                                                       | AGHY01000284.1:1794..3386   | ✓ | 1.00 | ✗ | 0.00 | ✓ | 0.91 |
| figl487527.6.peg.3316 hypothetical protein                                                                          | AGHY01000034.1:3931..4269   | ✓ | 1.00 | ✗ | 0.00 | ✓ | 0.97 |
| figl487527.6.peg.1658 Signal peptidase I (EC 3.4.21.89);Ontology_term=KEGG_ENZYME:3.4.21.89                         | AGHY01000956.1:989..1558    | ✓ | 1.00 | ✗ | 0.00 | ✓ | 0.98 |
| figl487527.6.peg.2756 Putative ribonucleoprotein related-protein                                                    | AGHY01000284.1:1591..44     | ✓ | 1.00 | ✗ | 0.00 | ✓ | 0.99 |
| figl487527.6.peg.2801 HlyD family secretion protein                                                                 | AGHY01000255.1:9..1196      | ✓ | 1.00 | ✗ | 0.00 | ✓ | 1.00 |
| figl487527.6.peg.2338 Succinate dehydrogenase hydrophobic membrane anchor protein                                   | AGHY01000499.1:3267..2935   | ✓ | 1.00 | ✗ | 0.00 | ✓ | 1.00 |
| figl487527.6.peg.1116 Uncharacterized glutathione S-transferase-like protein                                        | AGHY01001390.1:828..1460    | ✓ | 1.00 | ✗ | 0.00 | ✗ | 0.00 |
| figl487527.6.peg.1752 Superfamily II DNA/RNA helicases2C SNF2 family                                                | AGHY01000892.1:1329..589    | ✓ | 1.00 | ✗ | 0.01 | ✗ | 0.00 |
| figl487527.6.peg.1095 lipopolysaccharide biosynthesis protein                                                       | AGHY01001413.1:1776..1558   | ✓ | 1.00 | ✗ | 0.02 | ⚠ | 0.42 |
| figl487527.6.peg.1364 hypothetical protein                                                                          | AGHY01001204.1:3569..5083   | ✓ | 1.00 | ✗ | 0.02 | ✓ | 1.00 |



# NCPPB1131 predicted genes

|                                                                                                                |                           |   |      |   |      |   |      |
|----------------------------------------------------------------------------------------------------------------|---------------------------|---|------|---|------|---|------|
| fig 487527.6.peg.2837 choline/carnitine/betaine transporter                                                    | AGHY01000239.1:1839..2138 | ✓ | 1.00 | ✗ | 0.02 | ✗ | 0.00 |
| fig 487527.6.peg.1478 alginate biosynthesis protein                                                            | AGHY01001111.1:3545..3081 | ✓ | 1.00 | ✗ | 0.03 | ! | 0.64 |
| fig 487527.6.peg.326 hypothetical protein                                                                      | AGHY01002382.1:707..522   | ✓ | 1.00 | ✗ | 0.03 | ✗ | 0.02 |
| fig 487527.6.peg.1877 Gluconate transporter family protein                                                     | AGHY01000819.1:266..1003  | ✓ | 1.00 | ✗ | 0.04 | ✗ | 0.04 |
| fig 487527.6.peg.2984 wall associated protein                                                                  | AGHY01000161.1:2965..869  | ✓ | 1.00 | ✗ | 0.05 | ! | 0.60 |
| fig 487527.6.peg.2358 FIG01211701: hypothetical protein                                                        | AGHY01000491.1:41..1573   | ✓ | 1.00 | ✗ | 0.05 | ✗ | 0.10 |
| fig 487527.6.peg.218 hypothetical protein                                                                      | AGHY01002586.1:30..179    | ✓ | 1.00 | ✗ | 0.05 | ✗ | 0.00 |
| fig 487527.6.peg.1353 hypothetical protein                                                                     | AGHY01001209.1:371..760   | ✓ | 1.00 | ✗ | 0.12 | ✗ | 0.00 |
| fig 487527.6.peg.2581 hypothetical protein                                                                     | AGHY01000377.1:3208..2837 | ✓ | 1.00 | ✗ | 0.19 | ✗ | 0.00 |
| fig 487527.6.peg.1961 Glucose-1-phosphate thymidyltransferase (EC 2.7.7.24);Ontology_term=KEGG_ENZYME:2.7.7.24 | AGHY01000765.1:1345..590  | ✓ | 1.00 | ✗ | 0.19 | ✗ | 0.00 |
| fig 487527.6.peg.2679 sensor kinase                                                                            | AGHY01000329.1:2353..3072 | ✓ | 1.00 | ✗ | 0.19 | ✗ | 0.00 |
| fig 487527.6.peg.3183 hypothetical protein                                                                     | AGHY01000081.1:881..1222  | ✓ | 1.00 | ✗ | 0.23 | ✗ | 0.00 |
| fig 487527.6.peg.1146 hypothetical protein                                                                     | AGHY01001363.1:874..996   | ✓ | 1.00 | ✗ | 0.24 | ✗ | 0.00 |
| fig 487527.6.peg.3099 hypothetical protein                                                                     | AGHY01000108.1:1365..1249 | ✓ | 1.00 | ! | 0.33 | ✗ | 0.00 |
| fig 487527.6.peg.1664 GCN5-related N-acetyltransferase                                                         | AGHY01000950.1:2204..2725 | ✓ | 1.00 | ! | 0.34 | ✗ | 0.00 |
| fig 487527.6.peg.2291 hypothetical protein                                                                     | AGHY01000529.1:59..238    | ✓ | 1.00 | ! | 0.42 | ✗ | 0.00 |
| fig 487527.6.peg.2073 TonB-dependent receptor                                                                  | AGHY01000680.1:280..125   | ✓ | 1.00 | ! | 0.44 | ✗ | 0.00 |
| fig 487527.6.peg.222 hypothetical protein                                                                      | AGHY01002578.1:54..206    | ✓ | 1.00 | ! | 0.47 | ✗ | 0.05 |
| fig 487527.6.peg.2909 hypothetical protein                                                                     | AGHY01000200.1:1441..1572 | ✓ | 1.00 | ! | 0.55 | ✗ | 0.00 |
| fig 487527.6.peg.3071 hypothetical protein                                                                     | AGHY01000119.1:164..36    | ✓ | 1.00 | ! | 0.57 | ✗ | 0.00 |
| fig 487527.6.peg.1329 putative%3B ORF located using Glimmer/Genemark                                           | AGHY01001224.1:935..654   | ✓ | 1.00 | ! | 0.59 | ✗ | 0.00 |
| fig 487527.6.peg.1062 hypothetical protein                                                                     | AGHY01001441.1:3891..3703 | ✓ | 1.00 | ! | 0.59 | ✗ | 0.00 |
| fig 487527.6.peg.568 Putative outer membrane or secreted lipoprotein                                           | AGHY01002027.1:1572..463  | ✓ | 1.00 | ! | 0.65 | ✗ | 0.03 |
| fig 487527.6.peg.3347 hypothetical protein                                                                     | AGHY01000027.1:2524..2697 | ✓ | 1.00 | ✓ | 0.67 | ✗ | 0.05 |
| fig 487527.6.peg.1960 dTDP-4-dehydrorhamnose 32C5-epimerase (EC 5.1.3.13);Ontology_term=KEGG_ENZYME:5.1.3.13   | AGHY01000765.1:587..36    | ✓ | 1.00 | ✓ | 0.68 | ✗ | 0.00 |
| fig 487527.6.peg.1034 Transcriptional regulator2C AraC family                                                  | AGHY01001469.1:61..585    | ✓ | 1.00 | ✓ | 0.71 | ✗ | 0.00 |
| fig 487527.6.peg.2212 conserved hypothetical protein                                                           | AGHY01000585.1:1124..1531 | ✓ | 1.00 | ✓ | 0.78 | ✗ | 0.00 |
| fig 487527.6.peg.1536 hypothetical protein                                                                     | AGHY01001064.1:634..386   | ✓ | 1.00 | ✓ | 0.82 | ✗ | 0.00 |
| fig 487527.6.peg.714 hypothetical protein                                                                      | AGHY01001829.1:467..607   | ✓ | 1.00 | ✓ | 0.84 | ✗ | 0.00 |
| fig 487527.6.peg.3060 hypothetical protein                                                                     | AGHY01000124.1:2983..3156 | ✓ | 1.00 | ✓ | 0.89 | ✗ | 0.00 |
| fig 487527.6.peg.2211 Transcriptional regulator2C AraC family                                                  | AGHY01000585.1:483..1067  | ✓ | 1.00 | ✓ | 0.91 | ✗ | 0.00 |
| fig 487527.6.peg.2811 hypothetical protein                                                                     | AGHY01000252.1:2537..2743 | ✓ | 1.00 | ✓ | 0.99 | ✗ | 0.00 |
| fig 487527.6.peg.2104 TonB-dependent receptor                                                                  | AGHY01000663.1:5910..4954 | ✓ | 1.00 | ✓ | 1.00 | ✗ | 0.00 |
| fig 487527.6.peg.2813 Di-/tripeptide transporter                                                               | AGHY01000252.1:2979..3368 | ✓ | 1.00 | ✓ | 1.00 | ✗ | 0.00 |
| fig 487527.6.peg.1033 hypothetical protein                                                                     | AGHY01001469.1:210..16    | ✓ | 1.00 | ✓ | 1.00 | ✗ | 0.00 |
| fig 487527.6.peg.1211 hypothetical protein                                                                     | AGHY01001308.1:510..250   | ✓ | 1.00 | ✓ | 1.00 | ✗ | 0.00 |
| fig 487527.6.peg.1898 hypothetical protein                                                                     | AGHY01000805.1:45..191    | ✓ | 1.00 | ✓ | 1.00 | ✗ | 0.00 |
| fig 487527.6.peg.2102 TonB-dependent receptor                                                                  | AGHY01000663.1:4199..3534 | ✓ | 1.00 | ✓ | 1.00 | ✗ | 0.00 |
| fig 487527.6.peg.2103 TonB-dependent receptor                                                                  | AGHY01000663.1:4915..4196 | ✓ | 1.00 | ✓ | 1.00 | ✗ | 0.00 |
| fig 487527.6.peg.2812 Di-/tripeptide transporter                                                               | AGHY01000252.1:2713..2979 | ✓ | 1.00 | ✓ | 1.00 | ✗ | 0.00 |
| fig 487527.6.peg.3239 hypothetical protein                                                                     | AGHY01000059.1:1416..1093 | ✓ | 1.00 | ✓ | 1.00 | ✗ | 0.00 |
