# Supplementary material for: Draft Genome Sequences of Xanthomonas sacchari and Two Banana-Associated Xanthomonads Reveal Insights into the Xanthomonas Group 1 Clade
Source: MDPI journal article supplement (doi:10.3390/genes2041050), 2011-12-02
Supplement: s1 [file s1]

### Supplementary data files.

| File name                                     | File type                   | Description                                                                                                                                                                                                                                                        |
|-----------------------------------------------|-----------------------------|--------------------------------------------------------------------------------------------------------------------------------------------------------------------------------------------------------------------------------------------------------------------|
| GyraseA_alignment.pdf                         | PDF (Adobe Acrobat)         | Multiple sequence alignment of partial GyrA proteins from <i>Xanthomonas albilineans</i> and other gamma-Proteobacteria                                                                                                                                            |
| phylogenetic_trees.pdf                        | PDF (Adobe Acrobat)         | Phylogenetic analysis of fully sequenced members of the genera <i>Xanthomonas</i> , <i>Xylella</i> and <i>Steonotrophomonas</i> . Maximum likelihood trees are based on nucleotide sequences of the house-keeping genes <i>dnaK</i> , <i>groEL</i> and <i>recA</i> |
| NCPBP1131-sequences-not-in-X_albilineans.html | HTML (web browser)          | A list of regions in the genome of NCPBP1131 that share no detectable nucleotide sequence similarity with <i>X. albilineans</i>                                                                                                                                    |
| NCPBP1132-sequences-not-in-X_albilineans.html | HTML (web browser)          | A list of regions in the genome of NCPBP1132 that share no detectable nucleotide sequence similarity with <i>X. albilineans</i>                                                                                                                                    |
| NCPBP4393-sequences-not-in-X_albilineans.html | HTML (web browser)          | A list of regions in the genome of NCPBP4393 that share no detectable nucleotide sequence similarity with <i>X. albilineans</i>                                                                                                                                    |
| NCPBP1131-RAST.xls                            | Microsoft Excel spreadsheet | Automated annotation results for NCPBP1131 draft genome sequence generated by the RAST server                                                                                                                                                                      |
| NCPBP1132-RAST.xls                            | Microsoft Excel spreadsheet | Automated annotation results for NCPBP1132 draft genome sequence generated by the RAST server                                                                                                                                                                      |
| NCPBP4393-RAST.xls                            | Microsoft Excel spreadsheet | Automated annotation results for NCPBP4393 draft genome sequence generated by the RAST server                                                                                                                                                                      |
| NCPBP1131_genes_comparison.pdf                | PDF (Adobe Acrobat)         | A list of predicted genes in NCPBP1131 that are absent from NCPBP1132 and/or NCPBP4393 as judged by BWA alignments of raw Illumina sequence reads against the NCPBP1131 genome. Genomic coordinates are given on GenBank accession numbers                         |
| NCPBP1132_genes_comparison.pdf                | PDF (Adobe Acrobat)         | A list of predicted genes in NCPBP1132 that are absent from NCPBP1131 and/or NCPBP4393 as judged by BWA alignments of raw Illumina sequence reads against the NCPBP1132 genome. Genomic coordinates are given on GenBank accession numbers                         |
| NCPBP4393_genes_comparison.pdf                | PDF (Adobe Acrobat)         | A list of predicted genes in NCPBP4393 that are absent from NCPBP1131 and/or NCPBP1132 as judged by BWA alignments of raw Illumina sequence reads against the NCPBP4393 genome. Genomic coordinates are given on GenBank accession numbers                         |
| atpD_aligned_fasta.txt                        | Gapped FastA / plain text   | Multiple sequence alignment of <i>atpD</i> used to generate the phylogenetic tree in Figure 1 in the main text                                                                                                                                                     |
| gyrB_aligned_fasta.txt                        | Gapped FastA / plain text   | Multiple sequence alignment of <i>gyrB</i> used to generate the phylogenetic tree in Figure 1 in the main text                                                                                                                                                     |
